# Supplementary material for: Harnessing in-plane optical anisotropy in WS2 through ReS2 crystal
Source: Nanophotonics. 2025 Jan 31;14(10):1553–61. doi: 10.1515/nanoph-2024-0672 (PMC12116260; doi:10.1515/nanoph-2024-0672)
Supplement: Supplementary file 1 — Supplementary Material Details [file j_nanoph-2024-0672_suppl_001.docx]

**Supplementary Materials**

**Harnessing in-plane optical anisotropy in WS2 through ReS2 crystal**

Soyeong Kwon1, Tae Keun Yun2, Peiwen J. Ma1, and SungWoo Nam1,3*

1Department of Mechanical and Aerospace Engineering, University of California, Irvine, Irvine, CA 92697, USA

2Department of Physics, Yonsei University, Seoul, 03722, South Korea

3Department of Materials Science and Engineering, University of California, Irvine, Irvine, CA 92697, USA

***Corresponding Author Email:** [sungwoo.nam@uci.edu](mailto:sungwoo.nam@uci.edu)

**Keywords**: Transition metal dichalcogenides, Anisotropy, Photoluminescence, Charge transfer

**Supplementary Information 1**. (a) Raman spectra of WS2 (blue), ReS2 (black), and WS2/ReS2 (red) at excitation angle of 0° and (b) 90°.

**Supplementary Information 2**. (a) Atomic force microscopy topography scan image and height profiles along (b) line 1 and (c) line 2.

**Supplementary Information 3**. (a) PL spectrum of WS2 (blue), ReS2 (black), and WS2/ReS2 (red) at excitation angle of 90°, with an inset showing magnified spectrum in the range of ReS2 emission. Excitation angle-dependent PL spectra of (d) ReS2 in the range of ReS2 emission.


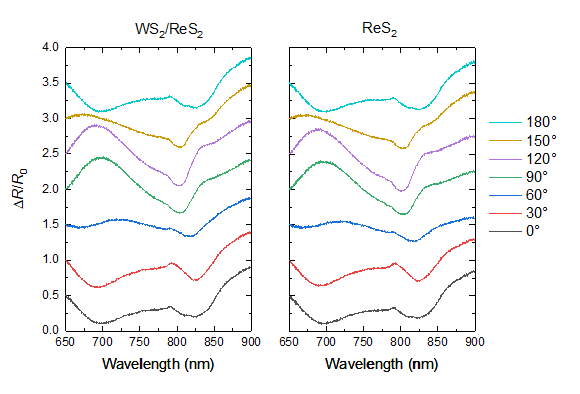


**Supplementary Information 4**. Excitation angle-dependent differential reflectance spectra of WS2/ReS2, ReS2 in the range of ReS2 absorption.


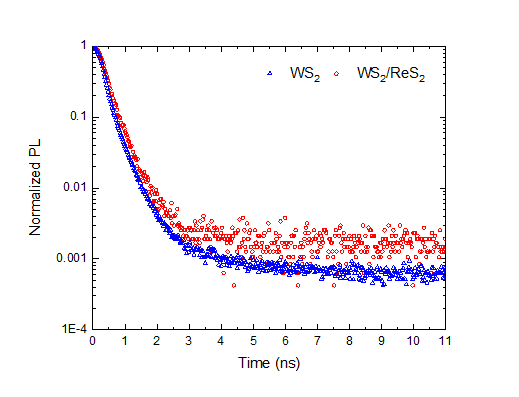


**Supplementary Information 5**. Time-resolved PL decay characteristics in WS2 (blue) and WS2/ReS2 (red) at an excitation angle of 90°.

**Supplementary Information 6**. Excitation angle (0° and 90°)-dependent PL spectra of WS2/ReS2 in the WS2 emission range at laser powers of (a) 2 mW and (b) 4 mW.

**Supplementary Information 7**. Excitation angle-dependent PL spectra of WS2/ReS2 in the WS2 emission range at laser powers of (a) 2 mW and (b) 47 mW.

**Supplementary Information 8**. Ratio of the integrated WS2 emission PL area, fitted with a Voigt function for each exciton (620 nm) and trion (630 nm) in WS2/ReS2 heterostructure at laser powers of (a) 4 mW, (b) 15 mW, and (c) 47 mW.
